# Supplementary material for: A Randomized Controlled Trial of Norepinephrine Plus Dobutamine Versus Epinephrine As First-Line Vasoactive Agents in Children With Fluid Refractory Cold Septic Shock
Source: PubMed Central journal article supplement — Crit Care Explor. 2022 Dec 28;5(1):e0815. doi: 10.1097/CCE.0000000000000815 (PMC9799172; doi:10.1097/cce.0000000000000815), 2022-12-28
Supplement: cc9-5-e0815-s001.pdf [file cc9-5-e0815-s001.pdf]

## **Supplemental Digital Content**

### **Norepinephrine plus Dobutamine versus Epinephrine as First line Vasoactive agents for Children with Fluid Refractory Cold Septic Shock – A Randomized Controlled Trial**

*Authors:* Kiran Kumar Banothu<sup>1</sup>, DM; Jhuma Sankar<sup>1</sup>, MD; U Vijaya Kumar<sup>1</sup>, DM; Priyanka Gupta<sup>1</sup>, MD; Mona Pathak<sup>2</sup>, PhD; Kana Ram Jat<sup>1</sup>, MD; SK Kabra<sup>1</sup>, MD; Rakesh Lodha<sup>1</sup>, MD

#### **Table of contents**

| Content                                                                                        | Page No |
|------------------------------------------------------------------------------------------------|---------|
| Figure 1. Study protocol                                                                       | 2       |
| Table 1. Study definitions                                                                     | 3-6     |
| Table 2. Timing of administration of various interventions during initial resuscitation        | 7       |
| Table 3. Comparison of hemodynamic variables and biochemical parameters between the two groups | 8-9     |

**Figure 1. Study protocol**

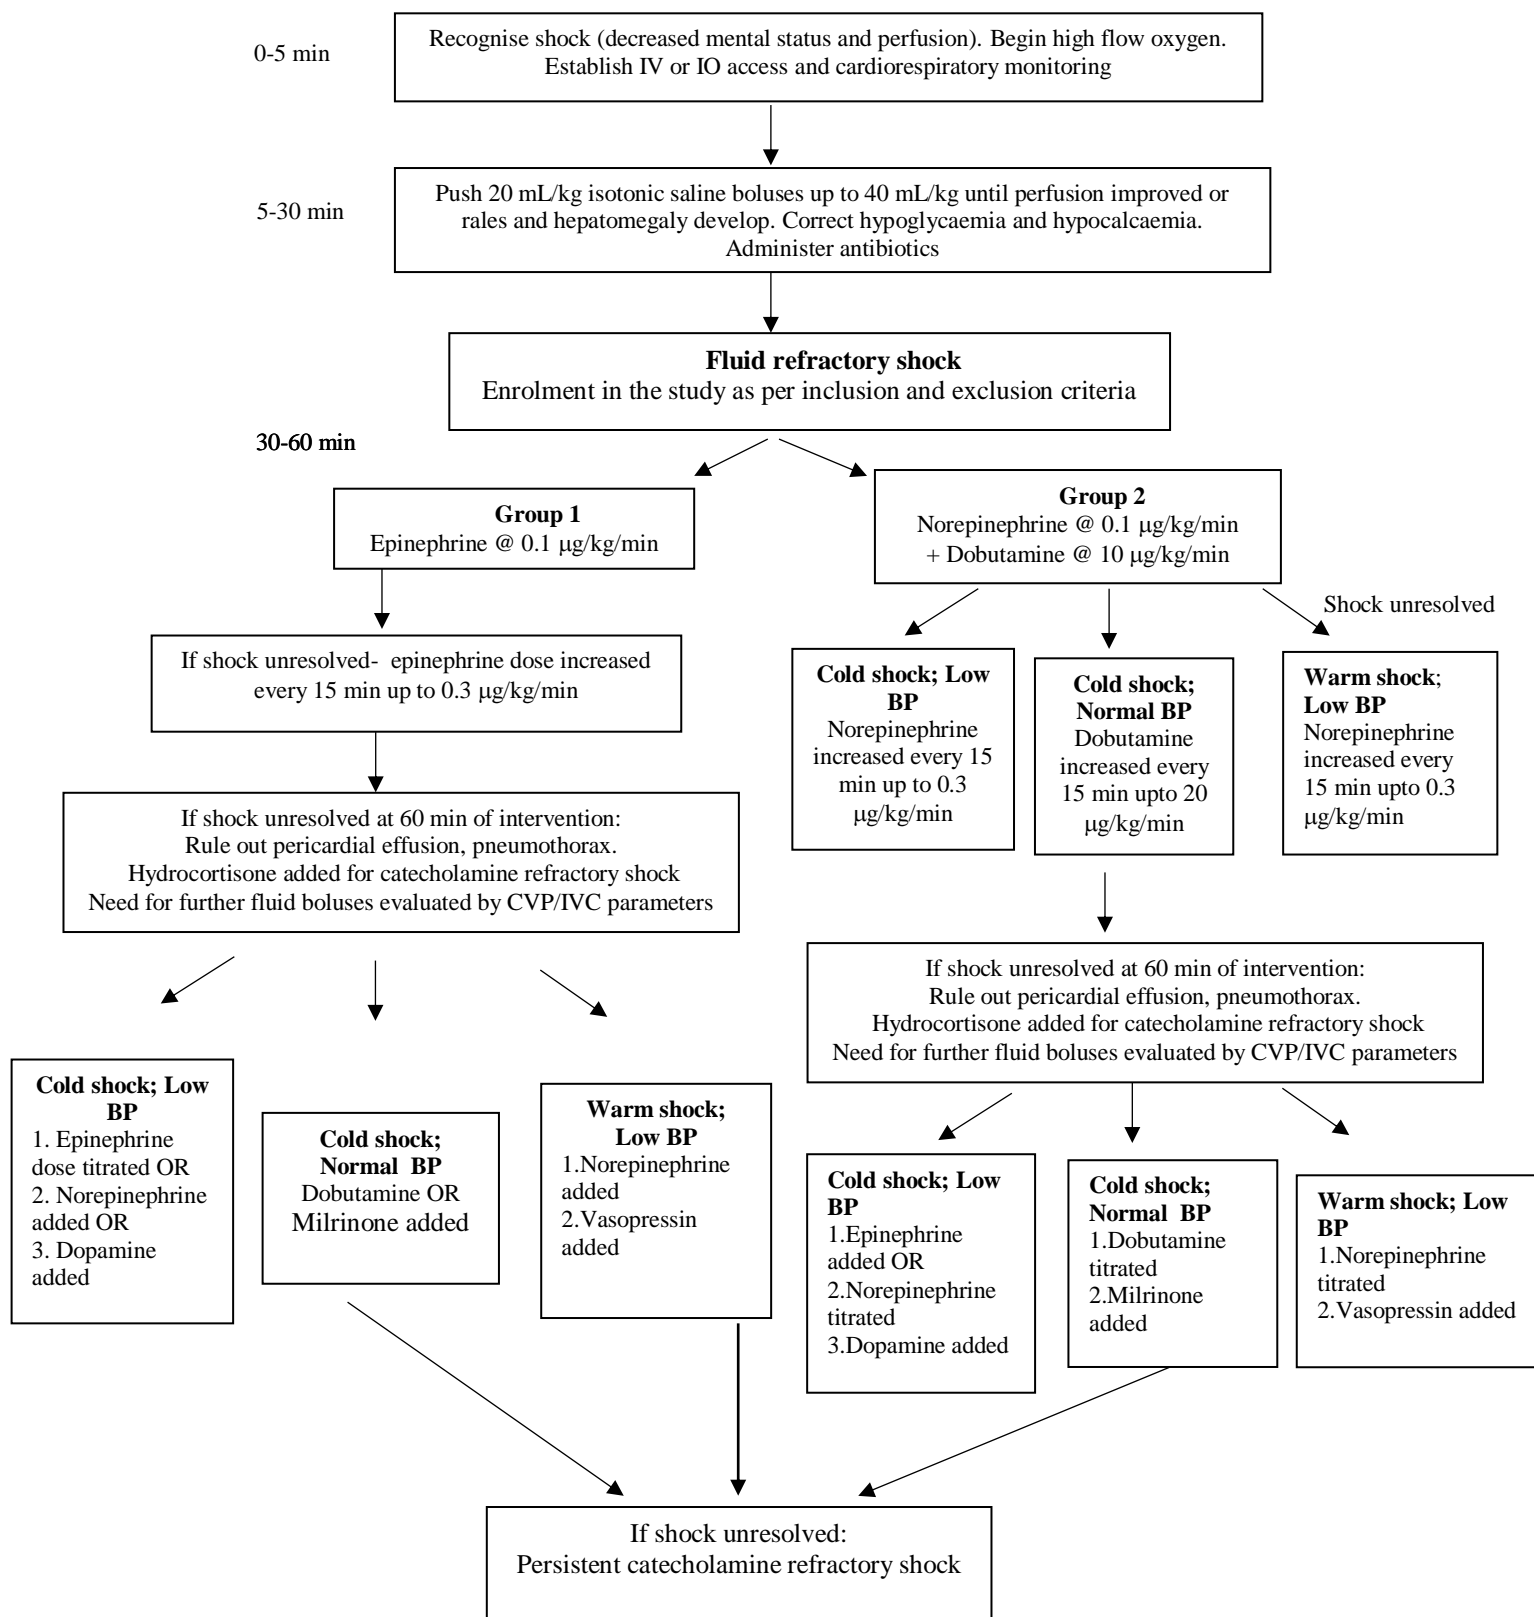

IV=Intravenous, IO=Intraosseous, BP=Blood pressure, CVP=Central venous pressure, IVC=Inferior vena cava.

**Table 1. Study definitions**

| <b>Definitions used for the study purpose</b>      |                                                                                                                                                                                                                                                                                                                                                                                                                                                                                                                                                                                                                                                                                                                                                                                                                                                                                                                                                                                                                                                                                                                                                                                                                         |                                                    |                         |                                              |                              |                     |
|----------------------------------------------------|-------------------------------------------------------------------------------------------------------------------------------------------------------------------------------------------------------------------------------------------------------------------------------------------------------------------------------------------------------------------------------------------------------------------------------------------------------------------------------------------------------------------------------------------------------------------------------------------------------------------------------------------------------------------------------------------------------------------------------------------------------------------------------------------------------------------------------------------------------------------------------------------------------------------------------------------------------------------------------------------------------------------------------------------------------------------------------------------------------------------------------------------------------------------------------------------------------------------------|----------------------------------------------------|-------------------------|----------------------------------------------|------------------------------|---------------------|
| Systemic inflammatory response syndrome (SIRS) (1) | <p>Systemic inflammatory response syndrome is defined by two of the following, one of which must be abnormal temperature or leucocyte count:</p> <ul style="list-style-type: none"> <li>• Temperature &gt;38.4°C or &lt;36°C</li> <li>• Heart rate &gt;160/min in infants and &gt;150/min in children</li> <li>• Respiratory rate &gt;60/min in infants and &gt;50/min in older children</li> <li>• Peripheral white blood cell count &lt;4000/mm<sup>3</sup> or &gt; 12,000/mm<sup>3</sup> or &gt;10% band forms.</li> </ul>                                                                                                                                                                                                                                                                                                                                                                                                                                                                                                                                                                                                                                                                                           |                                                    |                         |                                              |                              |                     |
| Sepsis (1)                                         | <p>SIRS due to infection</p> <p>Infection is defined as - A suspected or proven (by positive culture, tissue stain, or polymerase chain reaction test) infection caused by any pathogen OR a clinical syndrome associated with a high probability of infection. Evidence of infection includes positive findings on clinical exam, imaging, or laboratory tests (e.g., white blood cells in a normally sterile body fluid, perforated viscus, chest radiograph consistent with pneumonia, petechial or purpuric rash, or purpura fulminans)</p>                                                                                                                                                                                                                                                                                                                                                                                                                                                                                                                                                                                                                                                                         |                                                    |                         |                                              |                              |                     |
| Septic shock (1, 2)                                | <p>Children who had a suspected infection and had at least 2 of the following clinical signs of decreased perfusion with or without hypotension, including decreased mental status, prolonged capillary refill of &gt;2 seconds (cold shock), diminished (cold shock) or peripheral pulses, mottled cool extremities (cold shock), or parents gave history of decreased urine output.</p>                                                                                                                                                                                                                                                                                                                                                                                                                                                                                                                                                                                                                                                                                                                                                                                                                               |                                                    |                         |                                              |                              |                     |
| Mean arterial pressure                             | <p>Mean arterial pressure was calculated using definition suggested by Haque <i>et al</i> in 2007 and subsequently endorsed by the ACCM guidelines for hemodynamic support in children with septic shock in 2017 (3, 4).</p>                                                                                                                                                                                                                                                                                                                                                                                                                                                                                                                                                                                                                                                                                                                                                                                                                                                                                                                                                                                            |                                                    |                         |                                              |                              |                     |
| Central and peripheral pulses                      | <ol style="list-style-type: none"> <li>1. Central pulses are palpated in brachial artery and peripheral pulses in radial artery.</li> <li>2. For palpating the pulse, after following hand hygiene and positioning the hand for palpation, the artery is compressed lightly against the radius, obliterating the pulse initially. After this, the pressure is released so that it became easily palpable.</li> <li>3. The strength of the pulse is palpated based on thrust of the vessel against the fingertips and characterized as absent, thready, bounding or normal. To make this as less subjective as possible, we use a score as suggested in Siedel's guide to physical examination (5)</li> </ol> <table border="1" style="margin-left: auto; margin-right: auto;"> <thead> <tr> <th><b>Amplitude of the pulse on a scale of 0 to 3</b></th> </tr> </thead> <tbody> <tr> <td>0- absent, not palpable</td> </tr> <tr> <td>1- diminished, difficult to palpate, thready</td> </tr> <tr> <td>2- expected, easy to palpate</td> </tr> <tr> <td>3- bounding, strong</td> </tr> </tbody> </table> <p>The pulse character is cross checked by another physician/ nurse present at the time to confirm the same.</p> | <b>Amplitude of the pulse on a scale of 0 to 3</b> | 0- absent, not palpable | 1- diminished, difficult to palpate, thready | 2- expected, easy to palpate | 3- bounding, strong |
| <b>Amplitude of the pulse on a scale of 0 to 3</b> |                                                                                                                                                                                                                                                                                                                                                                                                                                                                                                                                                                                                                                                                                                                                                                                                                                                                                                                                                                                                                                                                                                                                                                                                                         |                                                    |                         |                                              |                              |                     |
| 0- absent, not palpable                            |                                                                                                                                                                                                                                                                                                                                                                                                                                                                                                                                                                                                                                                                                                                                                                                                                                                                                                                                                                                                                                                                                                                                                                                                                         |                                                    |                         |                                              |                              |                     |
| 1- diminished, difficult to palpate, thready       |                                                                                                                                                                                                                                                                                                                                                                                                                                                                                                                                                                                                                                                                                                                                                                                                                                                                                                                                                                                                                                                                                                                                                                                                                         |                                                    |                         |                                              |                              |                     |
| 2- expected, easy to palpate                       |                                                                                                                                                                                                                                                                                                                                                                                                                                                                                                                                                                                                                                                                                                                                                                                                                                                                                                                                                                                                                                                                                                                                                                                                                         |                                                    |                         |                                              |                              |                     |
| 3- bounding, strong                                |                                                                                                                                                                                                                                                                                                                                                                                                                                                                                                                                                                                                                                                                                                                                                                                                                                                                                                                                                                                                                                                                                                                                                                                                                         |                                                    |                         |                                              |                              |                     |

|                                                        |                                                                                                                                                                                                                                                                                                                                                                                                                                                                                                                                                                                                                                                                                                                                                                                                                              |
|--------------------------------------------------------|------------------------------------------------------------------------------------------------------------------------------------------------------------------------------------------------------------------------------------------------------------------------------------------------------------------------------------------------------------------------------------------------------------------------------------------------------------------------------------------------------------------------------------------------------------------------------------------------------------------------------------------------------------------------------------------------------------------------------------------------------------------------------------------------------------------------------|
| Peripheral temperature (peripheries were warm or cool) | <b>Peripheral temperature (peripheries are warm or cool)</b><br>This is measured by palpating the dorsal aspect of index finger with the dorsal aspect of examiners hand and comparing it with the forearm temperature (adapted from van Genderen ME <i>et al</i> methods of assessing peripheral perfusion in critically ill patients) (5). The finding is recorded as warm or cool. For each patient the finding is cross checked by another physician/nurse present at the time.                                                                                                                                                                                                                                                                                                                                          |
| Capillary refill time                                  | For measuring capillary refill the method suggested by Tibby <i>et al</i> (6) is followed and adapted to measure central capillary refill time. At the sternum or forehead, pressure is applied by the index finger for five seconds. The finger is then released and the time taken for the area compressed to return to its previous colour is recorded. Wristwatch is used to measure the accurate time. All measurements are made under adequate lighting conditions. Two measurements are taken for each patient each time. Measurements are only taken after a time interval of at least one hour and after a treatment that might alter the hemodynamic profile, such as a fluid bolus or the addition of an inotrope. Normal capillary refill is defined as $\leq 2$ seconds, and prolonged refill as $> 2$ seconds. |
| Improving mental status                                | Improvement in mental status from baseline is assessed using modified Glasgow Coma Scale for infants and children (7).                                                                                                                                                                                                                                                                                                                                                                                                                                                                                                                                                                                                                                                                                                       |
| Definitions used for study purposes                    |                                                                                                                                                                                                                                                                                                                                                                                                                                                                                                                                                                                                                                                                                                                                                                                                                              |
| Shock resolution                                       | Defined as attainment of at least 4 of the following therapeutic end points (2-4, 8) <ul style="list-style-type: none"> <li>• Appropriate-for-age mean arterial pressure (MAP)</li> <li>• Normal pulses with no difference between peripheral and central pulses</li> <li>• Warm extremities</li> <li>• Capillary refill time <math>&lt; 2</math> seconds</li> <li>• Improving mental status</li> <li>• Urine output <math>&gt; 1</math> mL/kg/hr</li> </ul> For the purpose of the study, shock resolution was defined as normal MAP for age <b>AND</b> any <b>FOUR</b> of the above (if not hypotensive shock) without need for fluid bolus or vasoactive dose escalation for 4 hours.                                                                                                                                     |
| Refractory to treatment                                | <b>Epinephrine group: Children not attaining shock resolution on epinephrine at 0.3 <math>\mu</math>g/kg/min.</b><br><b>Norepinephrine plus dobutamine group: Children not attaining shock resolution on norepinephrine at 0.3 <math>\mu</math>g/kg/min or dobutamine at 20 <math>\mu</math>g/kg/min.</b>                                                                                                                                                                                                                                                                                                                                                                                                                                                                                                                    |
| Time to achieving shock resolution                     | Time taken to achieve all the end points as defined above.                                                                                                                                                                                                                                                                                                                                                                                                                                                                                                                                                                                                                                                                                                                                                                   |
| p-SOFA score                                           | Simultaneous occurrence of two or more organ dysfunctions. Organ systems typically included in the diagnostic criteria of pediatric MODS are cardiovascular, pulmonary, neurologic, hematologic, renal, hepatic, and gastrointestinal (9)<br>The range for pSOFA score is 0 – 24 points (a higher score indicates a worse outcome), and the minimal clinically important difference is 3.                                                                                                                                                                                                                                                                                                                                                                                                                                    |
| Pediatric Index of mortality score (PIM-3)             | Ten variables of PIM-3 include pupillary reaction to light, systolic blood pressure, need for mechanical ventilation, base excess, PaO <sub>2</sub> /FiO <sub>2</sub> ratio, elective admission and specified diagnosis calculated within 1 hour of admission, high risk, low risk and very high risk diagnosis (10).                                                                                                                                                                                                                                                                                                                                                                                                                                                                                                        |

|                                                |                                                                                                                                                                                                                                                                                                                                                                                                                                                                                                                                                                      |
|------------------------------------------------|----------------------------------------------------------------------------------------------------------------------------------------------------------------------------------------------------------------------------------------------------------------------------------------------------------------------------------------------------------------------------------------------------------------------------------------------------------------------------------------------------------------------------------------------------------------------|
| Vasoactive inotrope score                      | The score is based on the dose, type and duration of inotropic medications. The score is obtained by summing the dose of inotrope while corrected for potency multiplied by the number of hours delivered. For example if a patient received dobutamine and epinephrine at different infusion rates and for different time periods, inotrope score will be calculated as follows: [(dobutamine dose $\mu\text{g}/\text{kg}$ per min x 1) x number of hours delivered] + [(epinephrine dose $\mu\text{g}/\text{kg}$ per min x 100) x number of hours delivered] (11). |
| Pediatric Logistic Organ Dysfunction (PELOD-2) | PELOD -2 score includes 9 variables for six key organ dysfunctions (cardiovascular, respiratory, hematologic, neurologic and renal) (12).                                                                                                                                                                                                                                                                                                                                                                                                                            |

## References

1. Goldstein B, Giroir B, Randolph A: International Consensus Conference on Pediatric Sepsis. International pediatric sepsis consensus conference: definitions for sepsis and organ dysfunction in pediatrics. *Pediatr Crit Care Med* 2005; 6:2-8.
2. Carcillo JA, Fields A: Clinical practice parameters for hemodynamic support of pediatric and neonatal patients in septic shock. *J Pediatr (Rio J)* 2002; 78:449-66.
3. Davis AL, Carcillo JA, Aneja RK, et al. American College of Critical Care Medicine Clinical Practice Parameters for Hemodynamic Support of Pediatric and Neonatal Septic Shock. *Crit Care Med* 2017; 45:1061-93.
4. Haque IU, Zaritsky AL: Analysis of the evidence for the lower limit of systolic and mean arterial pressure in children. *Pediatr Crit Care Med* 2007; 8:138-44.
5. van Genderen ME, van Bommel J, Lima A. Monitoring peripheral perfusion in critically ill patients at the bedside. *Curr Opin Crit Care* 2012; 18:273-9.
6. Tibby SM, Hatherill M, Murdoch IA: Capillary refill and core-peripheral temperature gap as indicators of haemodynamic status in paediatric intensive care patients. *Arch Dis Child* 1999; 80:163-6.
7. Morray JP, Tyler DC, Jones TK, Stuntz JT: Coma scale for use in brain-injured children. *Crit Care Med* 1984; 12:1018-20.
8. Pediatric Advanced Life Support Provider Manual, Chameides L, Samson RA, Schexnayder SM, Hazinski MF (Eds). 2012, American Heart Association, Dallas.
9. Matics TJ, Sanchez-Pinto LN: Adaptation and Validation of a Pediatric Sequential Organ Failure Assessment Score and Evaluation of the Sepsis-3 Definitions in Critically Ill Children. *JAMA Pediatr* 2017; 171:e172352.
10. Straney L, Clements A, Parslow RC, et al: ANZICS Paediatric Study Group and the Paediatric Intensive Care Audit Network. Paediatric index of mortality 3: an updated model for predicting mortality in pediatric intensive care. *Pediatr Crit Care Med* 2013; 14:673-81.
11. MG, Gurney JG, Yen AH, et al. Vasoactive-Inotropic Score as a predictor of morbidity and mortality in infants after cardiopulmonary bypass. *Pediatr Crit Care Med* 2010; 11:234-38.

12. Leteurtre S, Duhamel A, Salleron J, et al; Groupe Francophone de Réanimation et d'Urgences Pédiatriques (GFRUP): PELOD-2: An update of the Pediatric Logistic Organ Dysfunction score. *Crit Care Med* 2013; 41:1761–1773.

**Table 2. Timing of administration of various interventions during initial resuscitation**

| Variable                                                                      | Norepinephrine plus dobutamine group (n=34) | Epinephrine group (n=33) | p value |
|-------------------------------------------------------------------------------|---------------------------------------------|--------------------------|---------|
| • Time to administration of first dose of antibiotics (minutes), median (IQR) | 90 (50-160)                                 | 80 (20-40)               | 0.67    |
| • Time to administration of first fluid bolus (minutes), median (IQR)         | 10 (5-20)                                   | 8 (6-20)                 | 0.56    |
| • Time to initiation of inotropes (minutes), median (IQR)                     | 45 (30-50)                                  | 40 (25-45)               | 0.72    |

**Table 3. Comparison of hemodynamic variables and biochemical parameters between the two groups**

| Variable                              | Norepinephrine plus dobutamine group (n=34) | Epinephrine group (n=33) | Mean difference / Risk ratio (95% CI) | p value |
|---------------------------------------|---------------------------------------------|--------------------------|---------------------------------------|---------|
| <b>Heart rate (/min)</b>              |                                             |                          |                                       |         |
| 1 hour                                | 143.2 (25.8)                                | 146 (24.6)               | -2.7 (-15, 9.6)                       | 0.66    |
| 6 hours                               | 144.2 (27.1)                                | 150.7 (23.6)             | -6.5 (-18.9, 5.9)                     | 0.29    |
| 24 hours                              | 132.9 (30.3)                                | 144.4 (24.6)             | -11.4 (-25.1, 2.1)                    | 0.09    |
| 48 hours                              | 123.7 (27.6)                                | 138.1 (27.7)             | -14.3 (-28.2, -0.5)                   | 0.04    |
| 72 hours                              | 118.6 (24.7)                                | 128.9 (26.9)             | -10.2 (-23.3, 2.7)                    | 0.12    |
| At any time between 1 hr and 72 hours | NA                                          | NA                       | -9.03 (-19, 1.0)                      | 0.07    |
| <b>Mean blood pressure (mm Hg)</b>    |                                             |                          |                                       |         |
| 1 hour                                | 74 (12)                                     | 65.8 (14)                | 8.1 (1.7, 14.6)                       | 0.01    |
| 6 hours                               | 76.3 (15.6)                                 | 68.7 (10.7)              | 7.5 (0.9, 14.1)                       | 0.02    |
| 24 hours                              | 78.4 (12)                                   | 68.3 (9.4)               | 10 (4.6, 15.4)                        | 0.004   |
| 48 hours                              | 73.7 (13)                                   | 70.1 (10.7)              | 3.5 (-2.4, 9.6)                       | 0.24    |
| 72 hours                              | 75.7 (13.1)                                 | 74.3 (11.2)              | 1.3 (-4.8, 7.5)                       | 0.67    |
| At any time between 1 hr and 72 hours | NA                                          | NA                       | 6.4 (2.3, 10.5)                       | 0.002   |
| <b>Capillary refill time (sec)</b>    |                                             |                          |                                       |         |
| 1 hour                                | 2.8 (0.6)                                   | 3 (0.6)                  | -0.1 (-0.5, 0.1)                      | 0.28    |
| 6 hours                               | 2 (0.2)                                     | 2.3 (0.5)                | -0.2 (-0.4, -0.06)                    | 0.01    |
| 24 hours                              | 2 (0)                                       | 2.1 (0.4)                | -0.1 (-0.2, 0.01)                     | 0.08    |
| 48 hours                              | 2 (0.3)                                     | 2 (0.2)                  | 0.02 (-0.1, 0.1)                      | 0.79    |
| 72 hours                              | 2 (0.1)                                     | 2 (0.1)                  | -0.005 (-0.09, 0.08)                  | 0.91    |
| At any time between 1 hr and 72 hours | NA                                          | NA                       | -0.1 (-0.2, -0.01)                    | 0.02    |

|                                            |                     |                       |                    |      |
|--------------------------------------------|---------------------|-----------------------|--------------------|------|
| <b>Lactate (mmol/L), median (IQR)</b>      |                     |                       |                    |      |
| 1 hour                                     | 2.6 (2.4, 3.6)      | 3.6 (2.5, 5.5)        | NA                 | 0.02 |
| 6 hours                                    | 1.5 (0.9, 1.9)      | 2 (1.4, 4.1)          | NA                 | 0.01 |
| 24 hours                                   | 1.05 (0.75, 1.95)   | 1.4 (1, 2.6)          | NA                 | 0.11 |
| 48 hours                                   | 1.2 (0.8, 1.7)      | 1.3 (0.7, 1.6)        | NA                 | 0.86 |
| 72 hours                                   | 1.4 (1, 1.6)        | 1.25 (0.85, 2)        | NA                 | 0.68 |
| <b>Blood bicarbonate (mEq/L)</b>           |                     |                       |                    |      |
| 1 hour                                     | 18.6 (6.7)          | 19.6 (9.2)            | -0.9 (-4.9, 2.9)   | 0.62 |
| 6 hours                                    | 19.7 (7.3)          | 19.9 (8.3)            | 0.02 (-3.8, 3.9)   | 0.93 |
| 24 hours                                   | 21.3 (5.2)          | 20.2 (7.7)            | 1.1 (-2.1, 4.4)    | 0.48 |
| 48 hours                                   | 27.7 (9.7)          | 23.5 (7.2)            | 4.1 (-6.9, 15.2)   | 0.62 |
| 72 hours                                   | 23.1 (5)            | 23.2 (5.7)            | -0.08 (-2.9, 2.7)  | 0.95 |
| At any time between 1 hr. and 72 hours     | NA                  | NA                    | 1.08 (-2.2, 4.4)   | 0.52 |
| <b>Base deficit(mEq/L), median (IQR)</b>   |                     |                       |                    |      |
| 1 hour                                     | -7.9 (-10.1, -2.6)  | -8.15 (-13.85, -3.05) | NA                 | 0.68 |
| 6 hours                                    | -4.75 (-10.4, 0.25) | -6.7 (-11.9, -3.2)    | NA                 | 0.25 |
| 24 hours                                   | -4.1 (-8, 0.1)      | -5.8 (-10, -1.6)      | NA                 | 0.17 |
| 48 hours                                   | -1.85 (-5.3, 2.2)   | -2.05 (-5.4, 0.7)     | NA                 | 0.71 |
| 72 hours                                   | 0.75 (-5.5, 1.45)   | -0.5 (-4, 2.9)        | NA                 | 0.84 |
| <b>Cardiac index (L/min/m<sup>2</sup>)</b> |                     |                       |                    |      |
| 1 hour                                     | 3.8 (1.1) (n=26)    | 3.3 (1.3) (n=20)      | 0.5 (-0.2, 1.3)    | 0.15 |
| 6 hours                                    | 4 (1) (n=24)        | 3.1 (1.2) (n=17)      | 0.8 (0.1, 1.5)     | 0.01 |
| 24 hours                                   | 4.2 (1.1) (n=25)    | 3.5 (1.2) (n=16)      | 0.7 (-0.01, 1.5)   | 0.05 |
| 48 hours                                   | 3.5 (1) (n=14)      | 3.4 (1.1) (n=11)      | 0.04 (-0.9, 0.9)   | 0.9  |
| At any time between 1 hr and 72 hours      | NA                  | NA                    | 0.51 (-0.01, 1.04) | 0.05 |
| <b>Central pulses (normal), n (%)</b>      |                     |                       |                    |      |
| 1 hour                                     | 34 (100)            | 33 (100)              | NA                 | NA   |
| 6 hours                                    | 34 (100)            | 33 (100)              | NA                 | NA   |
| 24 hours                                   | 34 (100)            | 32 (100)              | NA                 | NA   |
| 48 hours                                   | 34 (100)            | 30 (100)              | NA                 | NA   |
| 72 hours                                   | 34 (100)            | 29 (100)              | NA                 | NA   |
| <b>Peripheral pulses (normal), n (%)</b>   |                     |                       |                    |      |
| 1 hour                                     | 31 (91.1)           | 28 (84.8)             | 1.07 (0.8, 1.2)    | 0.42 |
| 6 hours                                    | 34 (100)            | 31 (93.9)             | 1.06 (0.9, 1.1)    | 0.14 |
| 24 hours                                   | 34 (100)            | 31 (96.8)             | 1.03 (0.9, 1.09)   | 0.29 |
| 48 hours                                   | 33 (97)             | 30 (100)              | 0.9 (0.9, 1.02)    | 0.34 |
| 72 hours                                   | 34 (100)            | 29 (100)              | NA                 | NA   |
| <b>Peripheries (warm), n (%)</b>           |                     |                       |                    |      |
| 1 hour                                     | 7 (20.6)            | 5 (15.1)              | 1.3 (0.4, 3.8)     | 0.56 |
| 6 hours                                    | 29 (85.2)           | 22 (66.6)             | 1.2 (0.9, 1.6)     | 0.07 |
| 24 hours                                   | 34 (100)            | 29 (90.6)             | 1.1 (0.9, 1.2)     | 0.06 |
| 48 hours                                   | 31 (91.1)           | 30 (100)              | 0.9 (0.8, 1.01)    | 0.09 |
| 72 hours                                   | 33 (97)             | 28 (96.5)             | 1.0 (0.9, 1.1)     | 0.90 |

|                                    |           |           |                    |      |
|------------------------------------|-----------|-----------|--------------------|------|
| <b>Urine output<br/>(mL/kg/hr)</b> |           |           |                    |      |
| 6 hours                            | 2 (1.3)   | 2.4 (1.4) | -0.3 (-1.02, 0.3)  | 0.27 |
| 24 hours                           | 2 (1.4)   | 2.5 (1.8) | -0.5 (-1.3, 0.2)   | 0.22 |
| 48 hours                           | 1.8 (1.0) | 2.3 (1.6) | -0.4 (-1.1, 0.2)   | 0.26 |
| 72 hours                           | 2.1 (1.3) | 2.1 (1.3) | -0.005 (-0.6, 0.6) | 0.88 |

Data presented as mean (SD) unless otherwise specified  
NA = not applicable.
